# Supplementary material for: Structures of hydro-, chloro-, and bromo-substituted maleimides and 2,6-diaminopyridines, and of some of their 1 : 1 heterodimers
Source: Royal Society of Chemistry journal article supplement (doi:10.1039/c1ce05166k), 2011-01-01
Supplement: c1ce05166k.pdf [file c1ce05166k.pdf]

Supplementary Information for

**Structures of Hydro-, Chloro-, and Bromo-substituted Maleimides and 2,6-Diaminopyridines, and of Some of their 1:1 Heterodimers**

Tullio Pilati\*

*ISTM/CNR, c/o Dipartimento di Chimica Fisica ed Elettrochimica, Universita' degli Studi di Milano, via Golgi 19, I-20133, Milano, Italy*

Franco Cozzi\*

*Dipartimento di Chimica Organica e Industriale, Universita' degli Studi di Milano, via Golgi 19, I-20133, Milano, Italy*

Contents:

Supplementary Table 1: Refcodes of structures containing a three parallel H-bonds as shown in Fig 1b.

Supplementary Table 2: Main geometric parameters for HBs and XBs in the monomers.

Supplementary Table 3: The HBs in the **HMa/HPy** structure:

Supplementary Table 4: Main geometric parameters in the halogenated heterodimers.

Figure S1 - S12: ORTEP projection of monomers and heterodimers with numbering schemes.

Figure S13: ORTEP projection for the  $\square$ -polymorph of **CIMa**.

Supplementary Table 1.

Refcodes of structures containing a three parallel H-bonds as shown in Fig 1b (CCDC, version 5.31 updated at august 2010).

|          |          |          |          |        |
|----------|----------|----------|----------|--------|
| BUDWAY10 | JICWIB10 | QAFSOF   | WEWZAA   | YONNAQ |
| EWOBUN   | JICWOH10 | QOCTUX   | WOMGIP   | YONQAT |
| GOXCOL   | LULQIS   | RADKOX01 | WULXUW   | YONQEX |
| HECRIQ   | MAWPUW   | REGKIX   | XAXPIW   | ZUKXOS |
| HIMLUL   | MCYTIM10 | RUZMOO   | XESSAQ   | COWSUD |
| HIMMAS   | MINVIP   | SEPKON   | XIMMOV   | QOZFER |
| HIMMEW   | MIWFUU   | SEPNEG   | XOJVUN   | DUJCAN |
| JICTUK01 | MOCNIC   | TAZXAU   | XUNCUE   |        |
| JICVAS10 | ODOMIE   | VIFKUR   | XUNCUE01 |        |
| JICVOG20 | PANLAS   | VIXMOF   | YAZRAS   |        |
| JICVUM10 | POCPED   | VIXNAS   | YIHCOI   |        |

Supplementary Table 2. Main geometric parameters for HBs and XBs in the monomers. Distances and angles are in Å and °, respectively. Estimated standard deviations of calculated H atoms are omitted, as are those relative to HMa and HPy data, not reported in the original papers.

| Monomer | Contact type | Contact A-H $\cdots$ B or A-X $\cdots$ B | A $\cdots$ B distance | H $\cdots$ B distance | A-H $\cdots$ B or A-X $\cdots$ B angle |
|---------|--------------|------------------------------------------|-----------------------|-----------------------|----------------------------------------|
| HMa     | vertical     | N1-H3 $\cdots$ O2 $2-x,-y,-z$            | 2.884                 | 2.01                  | 170                                    |
|         | lateral      | C4-H2 $\cdots$ O1 $3/2-x,1/2+y,-1/2-z$   | 3.345                 | 2.45                  | 153                                    |
|         | lateral      | C2-H1 $\cdots$ O1 $1-x,-y,1-z$           | 3.307                 | 2.53                  | 139                                    |
| ClMa    | vertical     | N1-H1 $\cdots$ O2 $1-x,-y,1-z$           | 2.816(2)              | 1.96                  | 172                                    |
|         | XB           | C2-C11 $\cdots$ O1 $-x,-1/2+y,-1/2-z$    | 3.078(2)              |                       | 158.7(6)                               |
|         | XB           | C3-C12 $\cdots$ O1 $x,1+y,z$             | 3.148(2)              |                       | 170.5(7)                               |
| BrMa    | vertical     | N1-H1 $\cdots$ O2 $-x,-1/2+y,-1/2-z$     | 2.869(3)              | 2.02                  | 169                                    |
|         | XB           | C2-Br1 $\cdots$ O1 $1-x,1/2+y,1/2-z$     | 3.202(2)              |                       | 158.7(7)                               |
|         | XB           | C3-Br2 $\cdots$ O1 $x,1+y,z$             | 3.038(2)              |                       | 166.7(9)                               |
| HPy     | vertical     | N3-H6 $\cdots$ N1 $1-x,1/2+y,1/2-z$      | 2.982                 | 1.98                  | 170                                    |
|         | vertical     | N2-H4 $\cdots$ N2 $-1/2+x,1/2-y,-z$      | 3.203                 | 2.22                  | 161                                    |
|         | lateral      | N2-H5 $\cdots$ N3 $3/2+x,1-y,-1/2+z$     | 3.066                 | 2.08                  | 166                                    |
| ClPy    | vertical     | N2-H2A $\cdots$ N1 $1-x,y,-1/2+z$        | 3.136(2)              | 2.25(2)               | 172(2)                                 |
|         | vertical     | N3-H3A $\cdots$ N1 $1-x,y,1/2+z$         | 3.282(2)              | 2.45(2)               | 158(2)                                 |
|         | lateral      | N3-H3B $\cdots$ N3 $x,-y,1/2+z$          | 3.233(2)              | 2.58(2)               | 136(2)                                 |
|         | lateral      | N2-H2B $\cdots$ Cl1 $1/2-x,1/2-y,-1/2+z$ | 3.491(2)              | 2.68(2)               | 159(2)                                 |
|         | XB           | C4-Cl2 $\cdots$ Cl2 $x,-y,1/2+z$         | 3.4562(4)             |                       | 83.4(3)                                |
| BrPy    | vertical     | N2-H2A $\cdots$ N1 $1-x,-y,1-z$          | 3.182(3),             | 2.35(2)               | 167(2)                                 |
|         | lateral      | N2-H2B $\cdots$ Br1 $3/2-x,1/2-y,-1/2+z$ | 3.765(2)              | 3.03(2)               | 147(2)                                 |
|         | XB           | C2-Br2 $\cdots$ N1 $3/2-x,1/2-y,-1/2+z$  | 3.320(2)              |                       | 156.9(7)                               |

Supplementary Table 3.

The HBs in the **HMa/HPy** structure

| A-H...B                                   | d(A...B) Å | d(H...B) Å | Angle(A-H...B) ° |
|-------------------------------------------|------------|------------|------------------|
| N4-H1N4...N1                              | 2.8346(17) | 1.927(18)  | 179.43(17)       |
| N2-H1N2...O2                              | 3.203(2)   | 2.31(2)    | 162.26(17)       |
| N3-H1N3...O1                              | 3.124(2)   | 2.18(2)    | 170.08(17)       |
| N8-H1N8...N5                              | 2.827(2)   | 1.926(18)  | 176.75(15)       |
| N7-H1N7...O4                              | 3.022(2)   | 2.08(2)    | 177.66(18)       |
| N6-H1N6...O3                              | 3.247(2)   | 2.31(2)    | 171.14(19)       |
| N2-H2N2...O4 <sub>x,1/2-y,-1/2+z</sub>    | 3.071(2)   | 2.21(2)    | 170.84(17)       |
| N3-H2N3...O3 <sub>-1+x,1/2-y,-1/2+z</sub> | 3.121(2)   | 2.31(2)    | 164.97(17)       |
| C7-H7...O1 <sub>-x,1-y,2-z</sub>          | 3.429(2)   | 2.499(18)  | 165.99(14)       |
| N7-H2N7...O2                              | 2.970(2)   | 2.12(2)    | 162.76(18)       |
| N6-H2N6...N3 <sub>1+x,y,z</sub>           | 3.447(2)   | 2.69(2)    | 147.98(17)       |
| C11-H11...O1 <sub>1+x,y,z</sub>           | 3.446(2)   | 2.56(2)    | 160.13(16)       |

Supplementary Table 4. Main geometric parameters for halogenated heterodimers.  $MC_d$  is the centroid of a dimer calculated considering all its atoms and  $P_d$  is the relative mean least-squares molecular plane. Distances and angles are in Å and °, respectively.

|                                | CIMa/HPy              | BrMa/HPy               | HMa/CIPy                 | CIMa/CIPy                | BrMa/CIPy                 |
|--------------------------------|-----------------------|------------------------|--------------------------|--------------------------|---------------------------|
| Vertical                       | H1•••N4               | H1•••N4                | H4•••N1                  | H4•••N1                  | H4•••N1                   |
| N•••N                          | 2.779(3)              | 2.773(4)               | 2.844(3)                 | 2.810(2)                 | 2.796(2)                  |
| H•••N                          | 1.87(3)               | 1.97(4)                | 2.06(4)                  | 1.99(2)                  | 1.90(3)                   |
| N-H•••N                        | 177(2)                | 175(4)                 | 175(4)                   | 179(2)                   | 179(2)                    |
| Vertical                       | H2A•••O1              | H2A•••O1               | H2A•••O1                 | H2A•••O1                 | H2A•••O1                  |
| N•••O                          | 3.081(3)              | 3.084(4)               | 3.136(3)                 | 3.107(2)                 | 3.075(2)                  |
| H•••O                          | 2.25(3)               | 2.19(5)                | 2.34(3)                  | 2.29(2)                  | 2.25(2)                   |
| N-H•••O                        | 177(2)                | 176(4)                 | 174(3)                   | 175(2)                   | 173(2)                    |
| Vertical                       | H3A•••O2              | H3A•••O2               | H3A•••O2                 | H3A•••O2                 | H3A•••O2                  |
| N•••O                          | 3.093(3)              | 3.047(4)               | 3.132(3)                 | 3.139(2)                 | 3.147(2)                  |
| H•••O                          | 2.28(3)               | 2.20(5)                | 2.35(4)                  | 2.39(2)                  | 2.31(2)                   |
| N-H•••O                        | 174(2)                | 170(4)                 | 166(3)                   | 165(2)                   | 175(2)                    |
| Lateral                        | H2B•••O1 <sup>i</sup> | H2B•••O1 <sup>ii</sup> | H2B•••O1 <sup>iii</sup>  | H2B•••O1 <sup>iv</sup>   | -                         |
| N•••O                          | 2.903(3)              | 2.903(4)               | 2.919(3)                 | 3.210(2)                 |                           |
| H•••O                          | 2.10(3)               | 2.12(4)                | 2.15(3)                  | 2.50(2)                  |                           |
| N-H•••O                        | 158(2)                | 163(4)                 | 149(3)                   | 143(2)                   |                           |
| Lateral                        | H3B•••O2 <sup>v</sup> | H3B•••O2 <sup>vi</sup> | H3B•••O2 <sup>v</sup>    | H3B•••O2 <sup>vii</sup>  | H3B•••O2 <sup>iv</sup>    |
| N•••O                          | 2.930(3)              | 2.847(4)               | 2.917(3)                 | 3.080(2)                 | 3.180(2)                  |
| H•••O                          | 2.16(3)               | 2.00(4)                | 2.12(3)                  | 2.25(2)                  | 2.46(2)                   |
| N-H•••O                        | 154(2)                | 155(4)                 | 154(3)                   | 147(2)                   | 145(2)                    |
| Lateral                        |                       |                        |                          | Cl1•••Cl4 <sup>iii</sup> | Cl1•••Br1 <sup>vii</sup>  |
| Cl•••X                         | -                     | -                      | -                        | 3.3470(6)                | 3.3607(7)                 |
| C-Cl•••X                       |                       |                        |                          | 150.57(5)                | 131.64(7)                 |
| Cl•••X-C                       |                       |                        |                          | 129.75(4)                | 149.34(6)                 |
| Lateral                        |                       |                        |                          | Cl2•••Cl3 <sup>vii</sup> | Cl2•••Br <sup>iv</sup>    |
| Cl•••X                         | -                     | -                      | -                        | 3.3068(5)                | 3.3915(6)                 |
| C-Cl•••X                       |                       |                        |                          | 156.81(4)                | 161.68(6)                 |
| Cl•••X-C                       |                       |                        |                          | 121.49(5)                | 115.72(6)                 |
| Vertical <sup>†</sup>          |                       |                        | Cl1•••Cl1 <sup>iii</sup> |                          | Cl1•••Cl1 <sup>viii</sup> |
| Cl•••Cl                        | -                     | -                      | 3.395(2)                 | -                        | 3.3536(9)                 |
| C-Cl•••Cl                      |                       |                        | 145.52(9)                |                          | 162.57(7)                 |
| Cl•••Cl-C                      |                       |                        | 145.52(9)                |                          | 162.57(7)                 |
| Vertical <sup>†</sup>          |                       |                        | Cl2•••Cl2 <sup>ix</sup>  |                          | Cl2•••Br2 <sup>x</sup>    |
| Cl•••X                         | -                     | -                      | 3.335(2)                 | -                        | 3.5476(7)                 |
| C-Cl•••X                       |                       |                        | 149.42(9)                |                          | 103.39(6)                 |
| Cl•••X-C                       |                       |                        | 149.42(9)                |                          | 158.72(6)                 |
| $P_d$ ••• $P_d$ <sup>‡</sup>   | 3.330(2)              | 3.281(2)               | 3.097(2)<br>4.277(2)     | 3.218(2)<br>3.248(2)     | 3.180(2)<br>3.349(2)      |
| $MC_d$ ••• $MC_d$ <sup>‡</sup> | 3.784(2)              | 3.822(2)               | 3.558(2)<br>4.277(2)     | 3.588(2)<br>4.607(2)     | 3.609(2)<br>5.460(2)      |

<sup>‡</sup> Calculated on all the atoms; only in the case of CIMa/HPy and BrMa/HPy the two centroids above and below the central one are equidistant from that. <sup>†</sup> Joining two parallel tapes of dimers. i = 1-x, 1-y, -z; ii = 1-x, 1-y, 1-z; iii = -x, 2-y, 2-z; iv = -x, -y, 1-z; v = -x, 1-y, 1-z; vi = -x, 1-y, 2-z; vii = 2-x, 1-y, 1-z; viii = 2-x, -y, -z; ix = 2-x, 1-y, 2-z; x = x, -1+y, 1+z.

Figure S1.

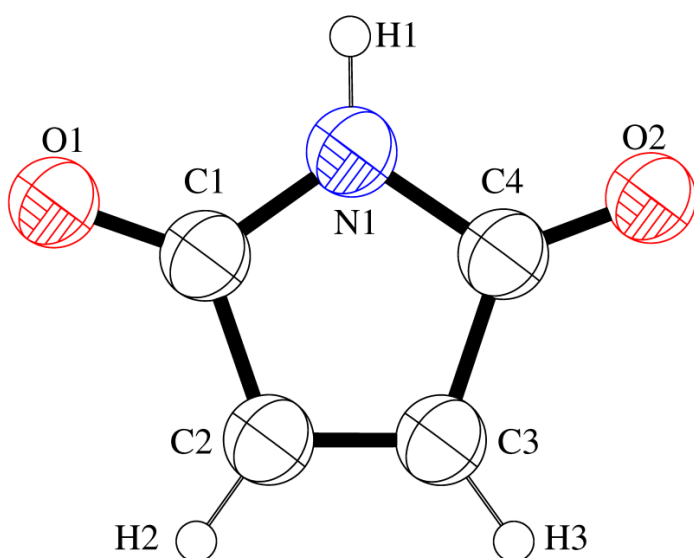

ORTEP projection of **HMa** (CCDC refcode TEKQAB01) with numbering scheme.  
ADPs at 50% level. H atoms not to scale.

Figure S2.

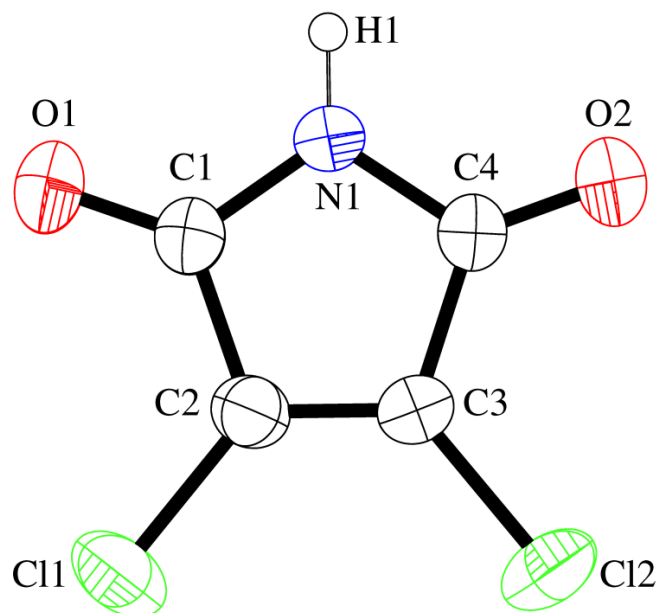

ORTEP projection of  $\alpha$  polymorph of **CIMa** with numbering scheme.  
ADPs at 50% level. H atoms not to scale.

Figure S3.

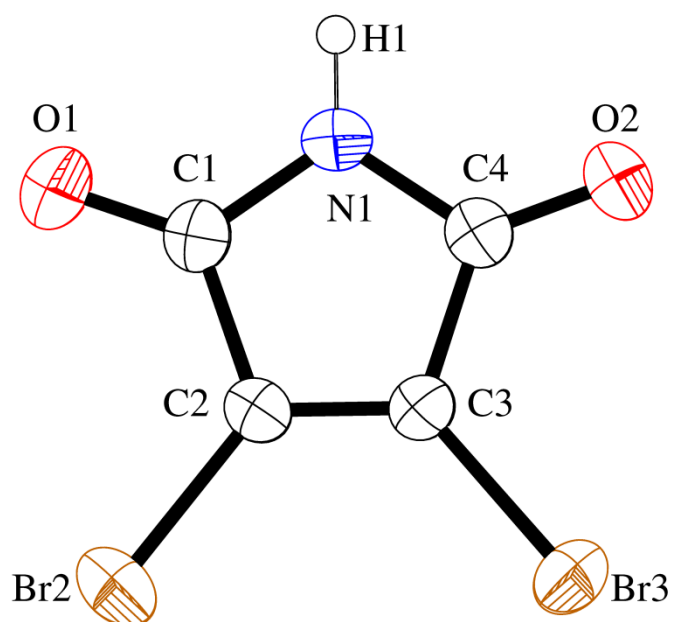

ORTEP projection of **BrMa** with numbering scheme.

ADPs at 50% level. H atoms not to scale.

Figure S4.

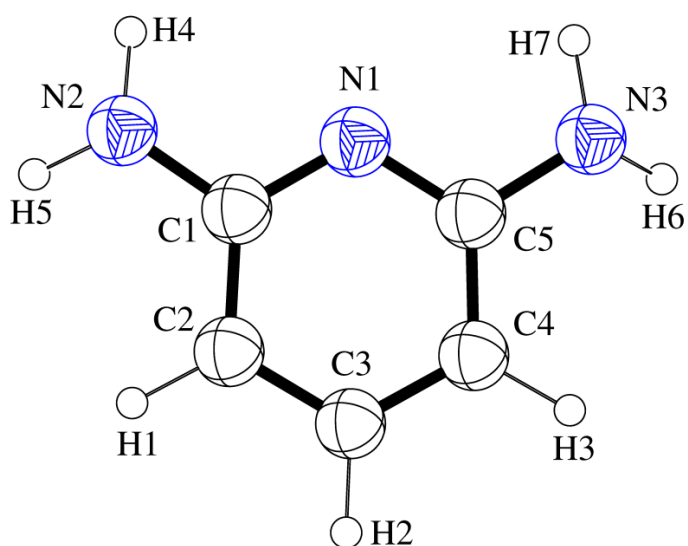

ORTEP projection of **HPy** (CCDC refcode FOYLEK) with numbering scheme.

ADPs at 50% level. H atoms not to scale

Figure S5.

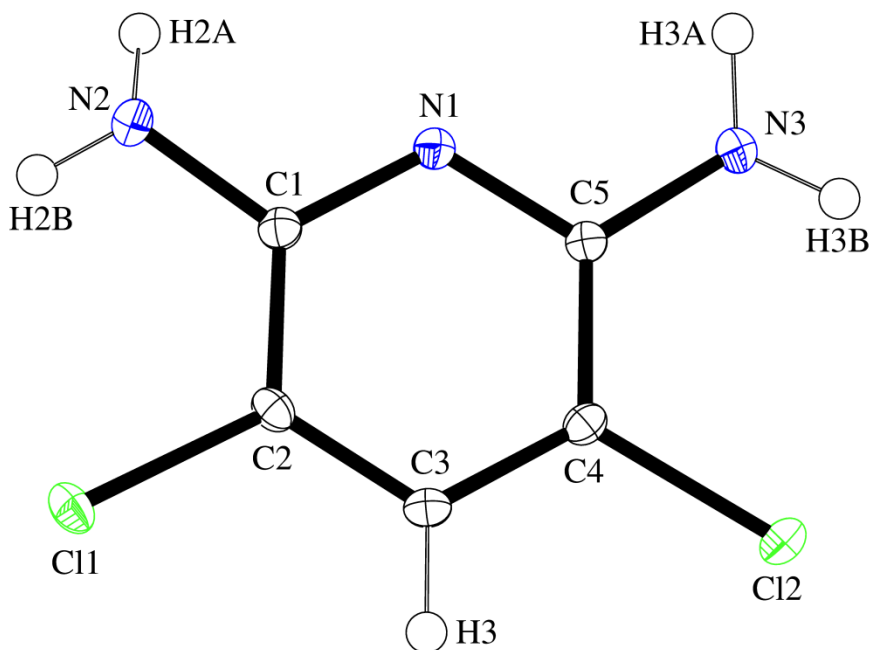

ORTEP projection of **CIPy** with numbering scheme.

ADPs at 50% level. H atoms not to scale.

Figure S6.

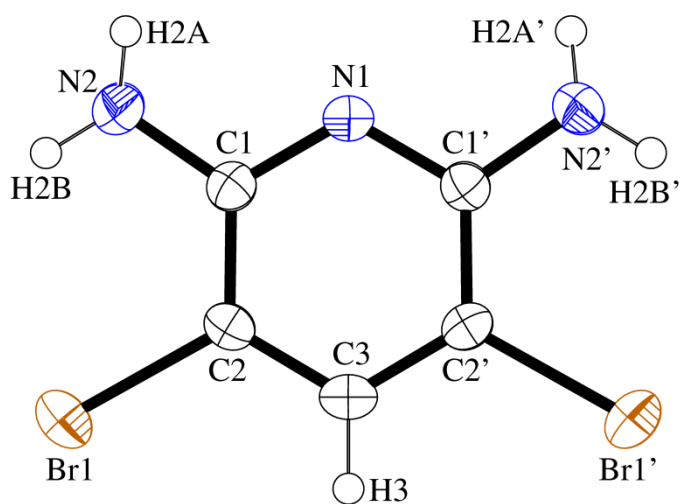

ORTEP projection of **HPy** with numbering scheme.

ADPs at 50% level. H atoms not to scale.

Figure S7.

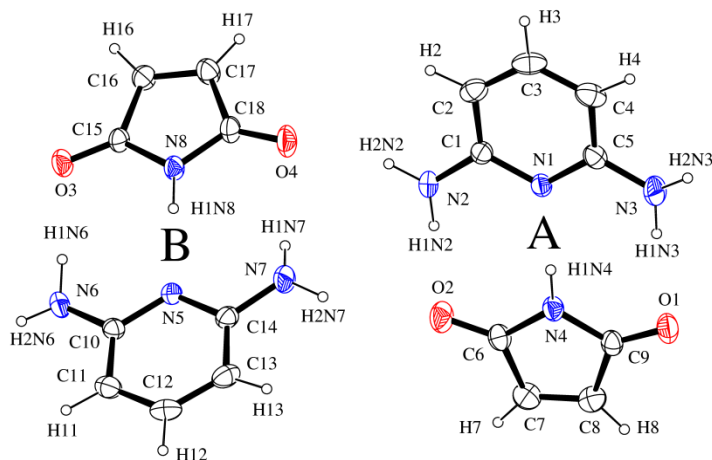

ORTEP projection of **HMa/HPy** with numbering scheme.

ADPs at 50% level. H atoms not to scale. **A** and **B** indicate the two independent dimers.

Figure S8.

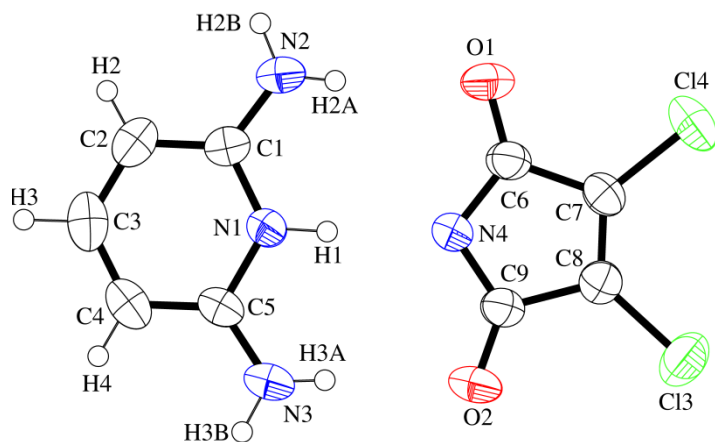

ORTEP projection of **CIMa/HPy** with numbering scheme.

ADPs at 50% level. H atoms not to scale.



Figure S9.

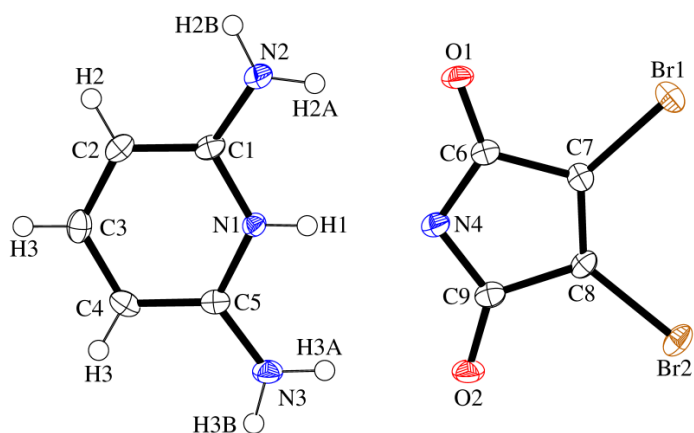

ORTEP projection of **BrMa/HPy** with numbering scheme.

ADPs at 50% level. H atoms not to scale.

Figure S10.

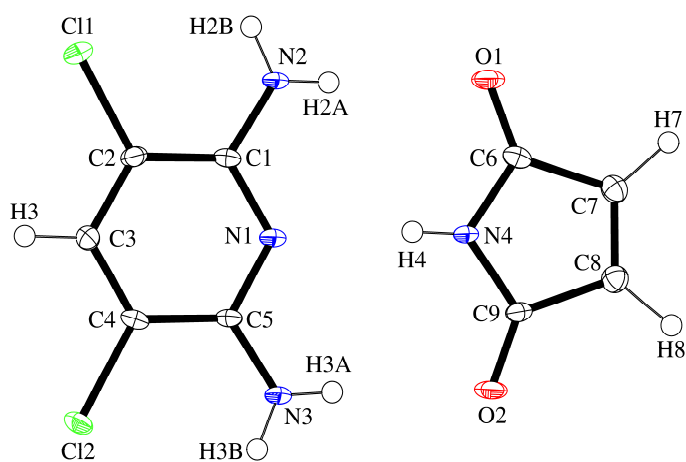

ORTEP projection of **HMa/CIPy** with numbering scheme.

ADPs at 50% level. H atoms not to scale.

Figure S11.

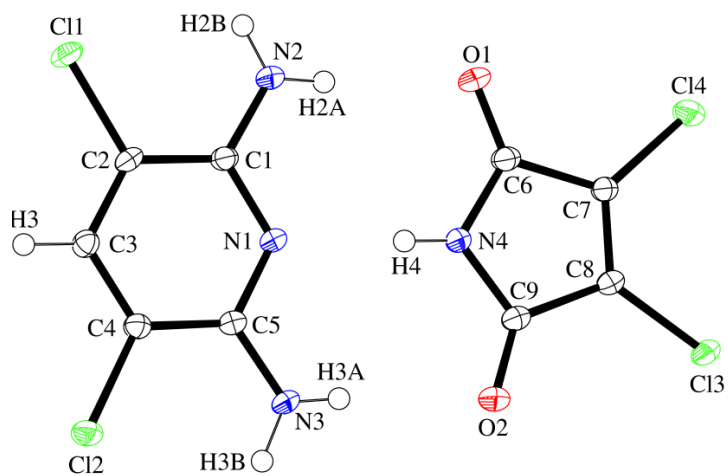

ORTEP projection of **CIMa/CIPy** with numbering scheme.

ADPs at 50% level. H atoms not to scale.

Figure S12.

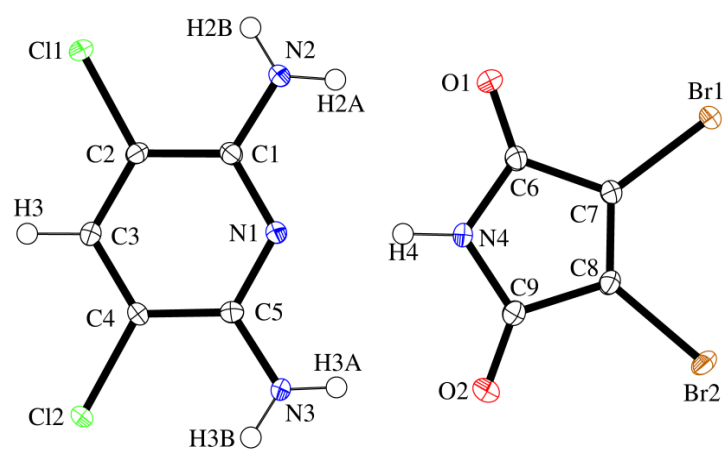

ORTEP projection of **CIMa/HPy** with numbering scheme.

ADPs at 50% level. H atoms not to scale.

Figure S13.

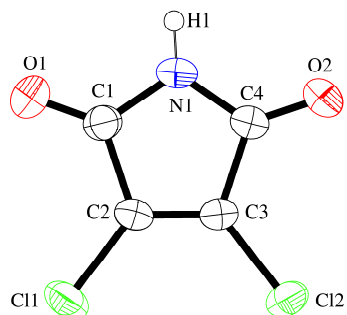

ORTEP projection of the  $\beta$  polymorph of **CIMa** with numbering scheme.

ADPs at 50% level. H atoms not to scale.
